# Supplementary material
Source: Springer Nature journal article supplement (https://www.springermedizin.de/resource/supplementary/12943_2011_899_MOESM13_ESM.pdf/9551956)

**A**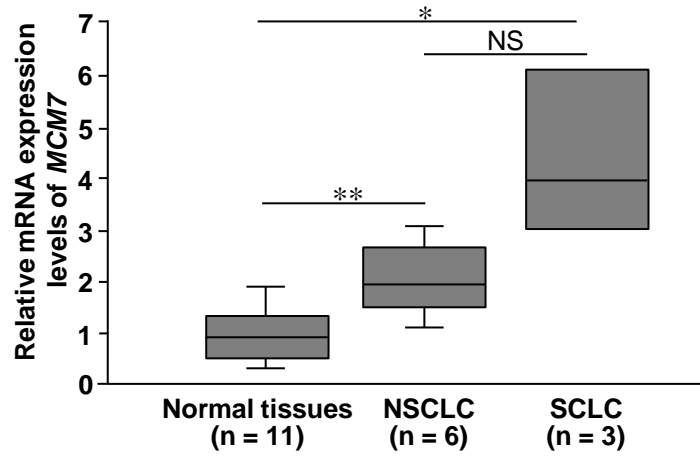**B**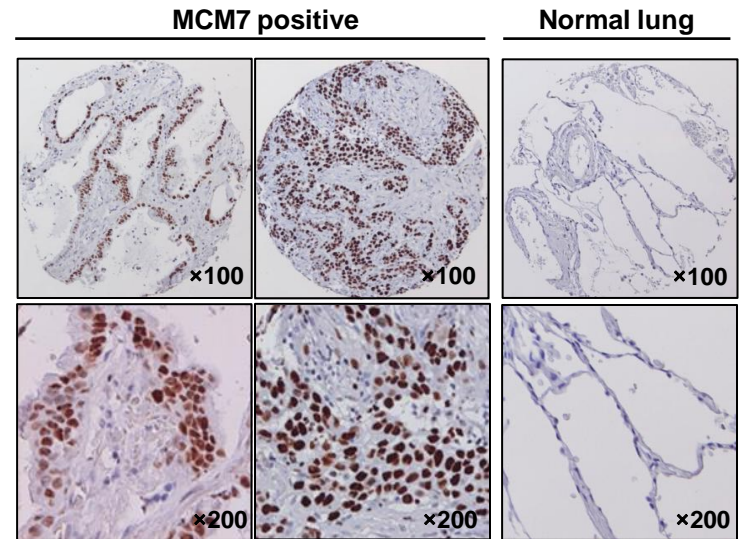**C**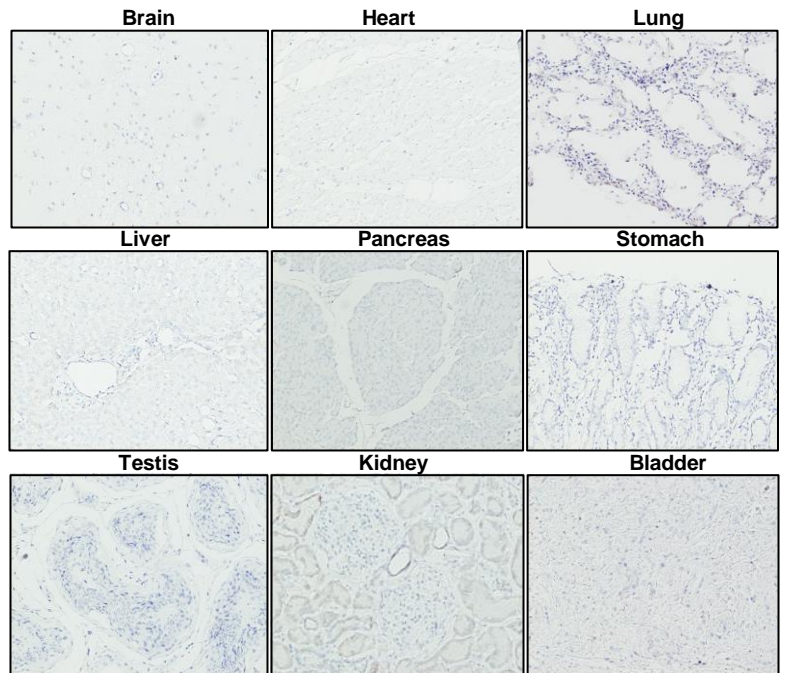

Magnification: x200

**D**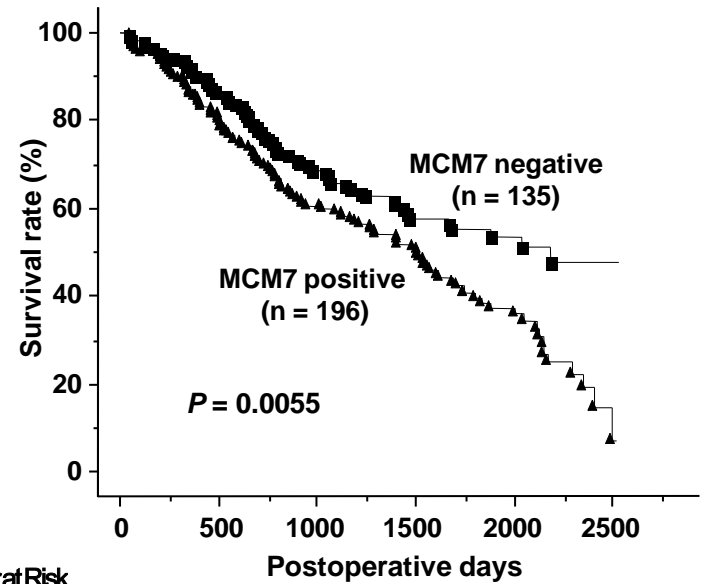

Number at Risk

|               | 0   | 500 | 1000 | 1500 | 2000 | 2500 |
|---------------|-----|-----|------|------|------|------|
| MCM7 negative | 135 | 117 | 93   | 52   | 26   | 3    |
| MCM7 positive | 196 | 160 | 119  | 66   | 28   | 1    |

Supplement: MOESM13 [file 9551956]
